# Supplementary material for: Negative linear compressibility in nanoporous metal–organic frameworks rationalized by the empty channel structural mechanism
Source: Royal Society of Chemistry journal article supplement (doi:10.1039/d1cp00214g), 2021-01-01
Supplement: d1cp00214g1.pdf [file d1cp00214g1.pdf]

## SUPPLEMENTARY INFORMATION

### **Negative linear compressibility in nanoporous metal-organic frameworks rationalized by the empty channel structural mechanism**

Francisco Colmenero<sup>a</sup>

<sup>a</sup>*Instituto de Estructura de la Materia (IEM-CSIC). C/ Serrano, 113. 28006 – Madrid, Spain.*

| <b>Contents:</b> |                                                                                                      | <b>Page</b> |
|------------------|------------------------------------------------------------------------------------------------------|-------------|
| (1)              | Appendix A. Comparison of the computed and experimental crystal structures                           | S.3         |
| (2)              | Table S.1. Material data and calculation parameters for the selected metal-organic frameworks        | S.4         |
| (3)              | Table S.2. Interatomic distances in zinc squarate tetrahydrate                                       | S.5         |
| (4)              | Table S.3. Interatomic angles in zinc squarate tetrahydrate                                          | S.6         |
| (5)              | Table S.4. Most intense reflections in the X-ray diffraction pattern of zinc squarate tetrahydrate   | S.7         |
| (6)              | Table S.5. Interatomic distances in titanium oxalate trioxide dihydrate                              | S.8         |
| (7)              | Table S.6. Interatomic angles in titanium oxalate trioxide dihydrate                                 | S.9         |
| (8)              | Table S.7. Most intense reflections in the X-ray diffraction pattern of titanium oxalate dihydrate   | S.10        |
| (9)              | Table S.8. Interatomic distances in titanium oxalate trioxide trihydrate                             | S.11        |
| (10)             | Table S.9. Interatomic angles in titanium oxalate trioxide trihydrate                                | S.12        |
| (11)             | Table S.10. Most intense reflections in the X-ray diffraction pattern of titanium oxalate trihydrate | S.13        |
| (12)             | Table S.11. Unit cell parameters of zinc squarate tetrahydrate under external isotropic pressures    | S.14        |
| (13)             | Table S.12. Compressibilities of zinc squarate tetrahydrate under external isotropic pressures       | S.15        |
| (14)             | Table S.13. Unit cell parameters of zinc squarate tetrahydrate under external anisotropic pressures  | S.16        |
| (15)             | Table S.14. Compressibilities of zinc squarate tetrahydrate under external anisotropic pressures     | S.17        |
| (16)             | Fig. S.1. Views of the unit cell of zinc squarate tetrahydrate under two anisotropic pressures       | S.18        |
| (17)             | Table S.15. Unit cell parameters of titanium oxalate dihydrate under external isotropic pressures    | S.19        |
| (18)             | Table S.16. Compressibilities of titanium oxalate dihydrate under external isotropic pressures       | S.20        |
| (19)             | Table S.17. Unit cell parameters of titanium oxalate dihydrate under external anisotropic pressures  | S.21        |
| (20)             | Table S.18. Compressibilities of titanium oxalate dihydrate under external anisotropic pressures     | S.22        |
| (21)             | Table S.19. Unit cell parameters of titanium oxalate trihydrate under external isotropic pressures   | S.23        |
| (22)             | Table S.20. Compressibilities of titanium oxalate trihydrate under external isotropic pressures      | S.24        |
| (23)             | Table S.21. Unit cell parameters of titanium oxalate trihydrate under external anisotropic pressures | S.25        |
| (24)             | Table S.22. Compressibilities of titanium oxalate trihydrate under external anisotropic pressures    | S.26        |
| (25)             | References                                                                                           | S.27        |

## Appendix A. Comparison of the computed and experimental crystal structures

### A.1. Zinc Squarate Tetrahydrate (ZnSqQh)

ZnSqQh is monoclinic, space group  $C2/c$ . Table 1 gives the computed and experimental<sup>1</sup> lattice parameters. As can be observed, the difference of the experimental unit cell volume and the calculated value using the PBE functional is very large, 10.5%, and is reduced to an exceedingly small value, 0.4%, when dispersion corrections are included. A comparison of the computed and experimental interatomic distances and angles is given in Table S.2 and Table S.3, respectively. The experimental C-C and C-O bond distances are reproduced within 0.01 Å. The accordance between the computed and experimental Zn-O bond lengths is better than 0.1 Å. The calculated and experimental interatomic angles, including the hydrogen bond angles, agree satisfactorily.

### A.2. Titanium oxalate trioxide dihydrate (TiOxDh)

TiOxDh is orthorhombic (space group  $Cmca$ ). For TiOxDh, as for ZnSqQh, the differences of the experimental<sup>2</sup> and calculated unit-cell parameters are largely reduced when dispersion corrections are introduced (see Table 1). The difference of the computed and experimental unit-cell volumes is reduced from 5.3 to 0.7%. Table S.5 and Table S.6 give the computed and experimental interatomic distances and angles in TiOxDh. The calculated and experimental C-C and C-O bond distances differ about 0.05 Å and the agreement for the calculated and experimental Ti-O bond distances is better than 0.1 Å. Since the hydrogen atom positions in TiOxDh were not provided by Boudaren *et al.*,<sup>2</sup> the fully optimized crystal structure obtained in this work is reported as a file with CIF (Crystallographic Information File) format.

### A.4. Titanium oxalate trioxide trihydrate (TiOxTh)

The structure of TiOxTh is similar to that of TiOxDh. In this case the positions of the hydrogen atoms were given by Boudaren *et al.*<sup>2</sup> The accuracy of the calculated unit-cell parameters of TiOxTh, is comparable to that of TiOxDh, as expected from the similarity of their structures. The computed and experimental unit-cell volumes differ by only 0.6%. The calculated and experimental interatomic distances and angles are provided in Table S.8 and Table S.9, respectively.

**Table S.1.** Material data and calculation parameters for the selected metal-organic frameworks (MOF).

| MOF                                               | Acronym | Structural formula                                               | Crystal system | Space group     | $\epsilon$ (eV) | $k$ -mesh             |
|---------------------------------------------------|---------|------------------------------------------------------------------|----------------|-----------------|-----------------|-----------------------|
| Zinc squarate tetrahydrate <sup>1</sup>           | ZnOxTh  | $\text{ZnC}_4\text{O}_4 \cdot 4 \text{H}_2\text{O}$              | Monoclinic     | $C2/c$ (no. 15) | 1000            | $3 \times 2 \times 4$ |
| Titanium oxalate trioxide dihydrate <sup>2</sup>  | TiOxDh  | $\text{Ti}_2(\text{C}_2\text{O}_4)_3 \cdot 2 \text{H}_2\text{O}$ | Orthorhombic   | $Cmca$ (no. 64) | 1000            | $1 \times 2 \times 2$ |
| Titanium oxalate trioxide trihydrate <sup>2</sup> | TiOxTh  | $\text{Ti}_2(\text{C}_2\text{O}_4)_3 \cdot 3 \text{H}_2\text{O}$ | Orthorhombic   | $Cmca$ (no. 64) | 1000            | $1 \times 2 \times 2$ |

**Table S.2.** Interatomic distances in zinc squarate tetrahydrate (in Å).

| Distance                        | Exp. <sup>1</sup> | Calc. |
|---------------------------------|-------------------|-------|
| <b>Zn-O</b>                     |                   |       |
| Zn-O1 × 2                       | 2.076(1)          | 2.147 |
| Zn-OW1 × 2                      | 2.076(1)          | 2.142 |
| Zn-OW2 × 2                      | 2.126(1)          | 2.207 |
| <b>C-C</b>                      |                   |       |
| C1-C2                           | 1.464             | 1.470 |
| C1-C2'                          | 1.467             | 1.479 |
| <C-C>                           | 1.466             | 1.474 |
| <b>C-O</b>                      |                   |       |
| C1-O1                           | 1.250             | 1.258 |
| C2-O2                           | 1.250             | 1.260 |
| <C-O>                           | 1.250             | 1.259 |
| <b>O-H</b>                      |                   |       |
| OW1-H11                         | 0.965(2)          | 0.984 |
| OW1-H12                         | 0.954(3)          | 0.985 |
| OW2-H21                         | 0.984(3)          | 1.000 |
| OW2-H22                         | 0.931(4)          | 0.974 |
| <b>Hydrogen bonds Oi-H...Oj</b> |                   |       |
| OW1...O2                        | 2.787(2)          | 2.778 |
| H11...O2                        | 1.823             | 1.796 |
| OW1...O1                        | 2.806(2)          | 2.744 |
| H12...O1                        | 1.869             | 1.778 |
| OW2...O2                        | 2.716(1)          | 2.656 |
| H21...O2                        | 1.759             | 1.667 |
| OW2...O2'                       | 2.986(1)          | 3.051 |
| H22...O2'                       | 2.165             | 2.217 |

**Table S.3.** Interatomic angles in zinc squarate tetrahydrate (in degrees).

| Angle                           | Exp. <sup>1</sup> | Calc.  |
|---------------------------------|-------------------|--------|
| <b>O-Zn-O</b>                   |                   |        |
| O1-Zn-O1                        | 180               | 180    |
| O1-Zn-OW1 × 2                   | 91.14(4)          | 90.53  |
| O1-Zn-OW1' × 2                  | 88.86(4)          | 89.47  |
| O1-Zn-OW2 × 2                   | 94.85(3)          | 95.88  |
| O1-Zn-OW2' × 2                  | 85.15(3)          | 84.11  |
| OW1-Zn-OW1'                     | 180               | 180    |
| OW1-Zn-OW2 × 2                  | 91.48(5)          | 93.69  |
| OW1-Zn-OW2' × 2                 | 82.52(2)          | 86.31  |
| OW2-Zn-OW2'                     | 180               | 180    |
| <b>C-C-C</b>                    |                   |        |
| C1-C2-C1                        | 89.66             | 89.61  |
| C2-C1-C2                        | 90.34             | 90.39  |
| <b>C-C-O</b>                    |                   |        |
| O1-C1-C2                        | 132.78            | 132.27 |
| O1-C1-C2'                       | 136.88            | 137.33 |
| C1-C2-O2                        | 134.42            | 133.92 |
| C1'-C2-O2                       | 135.92            | 136.46 |
| <b>O-H-O</b>                    |                   |        |
| H11-OW1-H12                     | 109.08            | 108.81 |
| H21-OW2-H22                     | 104.24            | 104.06 |
| <b>Hydrogen bonds Oi-H...Oj</b> |                   |        |
| OW1-H11...O2                    | 178.42(23)        | 175.70 |
| OW1-H12...O1                    | 166.39(28)        | 165.95 |
| OW2-H21...O2                    | 163.23(21)        | 169.04 |
| OW2-H22...O2'                   | 146.16(37)        | 142.88 |

**Table S.4.** Most intense reflections in the X-ray diffraction pattern of zinc squarate tetrahydrate: (a) X-ray pattern derived from the experimental crystal structure;<sup>1</sup> (b) X-ray pattern derived from the calculated crystal structure.

| $[h\ k\ l]$ | (a) Exp. <sup>1</sup> |         |         | (b) Calc.       |         | $\Delta (2\theta)$ |
|-------------|-----------------------|---------|---------|-----------------|---------|--------------------|
|             | $2\theta$ (deg)       | $d$ (Å) | $I$ (%) | $2\theta$ (deg) | $d$ (Å) |                    |
| [1 1 0]     | 11.952                | 7.399   | 39.63   | 11.928          | 7.414   | -0.02              |
| [0 2 0]     | 13.267                | 6.668   | 36.49   | 13.102          | 6.752   | -0.16              |
| [-1 1 1]    | 16.657                | 5.318   | 100.00  | 16.721          | 5.298   | 0.06               |
| [1 1 1]     | 19.084                | 4.647   | 51.95   | 19.090          | 4.645   | 0.01               |
| [2 0 0]     | 19.953                | 4.446   | 30.61   | 20.005          | 4.435   | 0.05               |
| [2 2 0]     | 24.037                | 3.699   | 24.90   | 23.988          | 3.707   | -0.05              |
| [-1 3 1]    | 25.223                | 3.528   | 53.19   | 25.088          | 3.547   | -0.13              |
| [0 4 0]     | 26.717                | 3.334   | 10.83   | 26.379          | 3.376   | -0.34              |
| [0 0 2]     | 26.763                | 3.328   | 70.27   | 26.898          | 3.312   | 0.13               |
| [1 3 1]     | 26.918                | 3.310   | 11.92   | 26.755          | 3.329   | -0.16              |
| [3 1 0]     | 30.877                | 2.894   | 6.44    | 30.937          | 2.888   | 0.06               |
| [1 1 2]     | 30.885                | 2.893   | 17.49   | 30.962          | 2.886   | 0.08               |
| [2 4 0]     | 33.570                | 2.667   | 33.89   | 33.328          | 2.686   | -0.24              |
| [-2 -4 1]   | 34.972                | 2.564   | 5.74    | 34.794          | 2.576   | -0.18              |
| [2 0 2]     | 36.211                | 2.479   | 8.53    | 36.288          | 2.474   | 0.08               |
| [3 3 0]     | 36.400                | 2.466   | 9.76    | 36.325          | 2.471   | -0.07              |
| [1 3 2]     | 36.407                | 2.466   | 5.34    | 36.347          | 2.470   | -0.06              |
| [-3 -3 1]   | 37.098                | 2.422   | 43.17   | 37.090          | 2.422   | -0.01              |
| [0 4 2]     | 38.176                | 2.356   | 6.81    | 38.030          | 2.364   | -0.15              |
| [3 3 1]     | 40.658                | 2.217   | 9.29    | 40.575          | 2.222   | -0.08              |
| [-1 1 3]    | 40.818                | 2.209   | 9.37    | 41.057          | 2.197   | 0.24               |
| [-2 4 2]    | 41.228                | 2.188   | 18.58   | 41.169          | 2.191   | -0.06              |
| [1 1 3]     | 44.127                | 2.051   | 14.05   | 44.281          | 2.044   | 0.15               |
| [-1 3 3]    | 45.299                | 2.000   | 16.61   | 45.413          | 1.996   | 0.11               |
| [2 4 2]     | 45.566                | 1.989   | 6.13    | 45.418          | 1.995   | -0.15              |
| [2 6 0]     | 45.592                | 1.988   | 7.30    | 45.139          | 2.007   | -0.45              |
| [-3 -5 1]   | 46.303                | 1.959   | 11.31   | 46.087          | 1.968   | -0.22              |
| [1 3 3]     | 48.363                | 1.881   | 10.37   | 48.405          | 1.879   | 0.04               |
| [4 4 0]     | 49.221                | 1.850   | 6.95    | 49.116          | 1.853   | -0.10              |
| [-1 7 1]    | 50.375                | 1.810   | 8.11    | 49.808          | 1.829   | -0.57              |
| [1 7 1]     | 51.336                | 1.778   | 10.62   | 50.755          | 1.797   | -0.58              |
| [-5 -1 1]   | 51.399                | 1.776   | 10.71   | 51.602          | 1.770   | 0.20               |
| [-3 3 3]    | 51.511                | 1.773   | 6.89    | 51.724          | 1.766   | 0.21               |
| [0 0 4]     | 55.145                | 1.664   | 6.59    | 55.441          | 1.656   | 0.30               |
| [-5 -3 1]   | 55.214                | 1.662   | 5.93    | 55.316          | 1.659   | 0.10               |
| [3 7 1]     | 60.547                | 1.528   | 5.34    | 60.050          | 1.539   | -0.50              |
| [-2 4 4]    | 62.824                | 1.478   | 6.28    | 63.022          | 1.474   | 0.20               |

**Table S.5.** Interatomic distances in titanium oxalate trioxide dihydrate (in Å).

| <b>Distance</b>                 | <b>Exp.<sup>2</sup></b> | <b>Calc.</b> |
|---------------------------------|-------------------------|--------------|
| <b>Ti-O</b>                     |                         |              |
| Ti-O1                           | 2.221(7)                | 2.118        |
| Ti-O2                           | 2.203(6)                | 2.227        |
| Ti-O3                           | 1.815(3)                | 1.817        |
| Ti-O4                           | 1.805(2)                | 1.807        |
| Ti-O5                           | 1.802(2)                | 1.811        |
| Ti-OW1                          | 2.171(7)                | 2.148        |
| <b>C-C</b>                      |                         |              |
| C1-C2                           | 1.490(20)               | 1.533        |
| <b>C-O</b>                      |                         |              |
| C1-O1                           | 1.264(9)                | 1.258        |
| C2-O2                           | 1.212(8)                | 1.259        |
| <b>O-H</b>                      |                         |              |
| OW1-H11                         | -                       | 0.977        |
| OW1-H12                         | -                       | 1.001        |
| <b>Hydrogen bonds Oi-H...Oj</b> |                         |              |
| OW1...O2                        | -                       | 2.885        |
| H12...O2                        | -                       | 2.619        |
| OW1...O3                        | -                       | 3.532        |
| H11...O2                        | -                       | 2.619        |



**Table S.6.** Interatomic angles in titanium oxalate trioxide dihydrate (in degrees).

| <b>Angle</b>                    | <b>Exp.<sup>2</sup></b> | <b>Calc.</b> |
|---------------------------------|-------------------------|--------------|
| <b>O-Ti-O</b>                   |                         |              |
| O1-Ti-O2                        | 75.1(4)                 | 74.75        |
| O1-Ti-O3                        | 87.3(3)                 | 89.54        |
| O1-Ti-O4                        | 158.6(4)                | 157.46       |
| O1-Ti-O5                        | 96.3(4)                 | 92.85        |
| O1-Ti-OW1                       | 78.0(4)                 | 76.26        |
| O2-Ti-O3                        | 160.5(4)                | 163.90       |
| O2-Ti-O4                        | 90.1(3)                 | 88.41        |
| O2-Ti-O5                        | 89.6(4)                 | 85.24        |
| O2-Ti-OW1                       | 77.4(4)                 | 80.05        |
| O3-Ti-O4                        | 104.3(3)                | 105.75       |
| O3-Ti-O5                        | 100.9(3)                | 99.28        |
| O3-Ti-OW1                       | 90.9(5)                 | 93.01        |
| O4-Ti-O5                        | 98.9(2)                 | 100.69       |
| O4-Ti-OW1                       | 83.8(3)                 | 86.30        |
| O5-Ti-OW1                       | 166.8(4)                | 163.55       |
| <b>O-C-O</b>                    |                         |              |
| O2-C2-O2'                       | 123.4(9)                | 128.37       |
| O1-C2-O1'                       | 117.4(9)                | 127.10       |
| <b>C-C-O</b>                    |                         |              |
| C1-C2-O2                        | 117(1)                  | 115.77       |
| C2-C1-O1                        | 120(1)                  | 116.41       |
| <b>O-H-O</b>                    |                         |              |
| H11-OW1-H2                      | -                       | 108.42       |
| <b>Hydrogen bonds Oi-H...Oj</b> |                         |              |
| OW1-H12...O2                    | -                       | 175.40       |
| OW1-H11...O3                    | -                       | 155.66       |

**Table S.7.** Most intense reflections in the X-ray diffraction pattern of titanium oxalate trioxide dihydrate: (a) X-ray pattern derived from the experimental crystal structure;<sup>2</sup> (b) X-ray pattern derived from the calculated crystal structure.

| $[h\ k\ l]$ | (a) Exp. <sup>2</sup>   |                   |           | (b) Calc.               |                   | $\Delta\ (2\theta)$ |
|-------------|-------------------------|-------------------|-----------|-------------------------|-------------------|---------------------|
|             | $2\theta\ (\text{deg})$ | $d\ (\text{\AA})$ | $I\ (\%)$ | $2\theta\ (\text{deg})$ | $d\ (\text{\AA})$ |                     |
| [2 0 0]     | 11.456                  | 7.718             | 38.11     | 11.422                  | 7.741             | -0.03               |
| [1 1 1]     | 13.722                  | 6.448             | 100.00    | 13.702                  | 6.458             | -0.02               |
| [0 2 0]     | 17.003                  | 5.211             | 17.85     | 16.792                  | 5.276             | -0.21               |
| [0 2 1]     | 19.325                  | 4.589             | 67.44     | 19.176                  | 4.625             | -0.15               |
| [1 1 2]     | 21.004                  | 4.226             | 36.48     | 21.092                  | 4.209             | 0.09                |
| [3 1 1]     | 21.312                  | 4.166             | 25.82     | 21.261                  | 4.176             | -0.05               |
| [2 2 1]     | 22.522                  | 3.945             | 5.67      | 22.375                  | 3.970             | -0.15               |
| [0 2 2]     | 25.075                  | 3.549             | 10.79     | 25.045                  | 3.553             | -0.03               |
| [3 1 2]     | 26.656                  | 3.342             | 47.14     | 26.697                  | 3.337             | 0.04                |
| [2 2 2]     | 27.646                  | 3.224             | 5.98      | 27.604                  | 3.229             | -0.04               |
| [1 3 1]     | 27.867                  | 3.199             | 21.38     | 27.593                  | 3.230             | -0.27               |
| [4 2 1]     | 30.235                  | 2.954             | 9.46      | 30.083                  | 2.968             | -0.15               |
| [5 1 1]     | 31.578                  | 2.831             | 18.49     | 31.491                  | 2.839             | -0.09               |
| [1 3 2]     | 32.206                  | 2.777             | 6.20      | 32.035                  | 2.792             | -0.17               |
| [0 2 3]     | 32.586                  | 2.746             | 8.37      | 32.675                  | 2.738             | 0.09                |
| [0 4 0]     | 34.396                  | 2.605             | 7.62      | 33.959                  | 2.638             | -0.44               |
| [2 2 3]     | 34.647                  | 2.587             | 14.40     | 34.721                  | 2.582             | 0.07                |
| [5 1 2]     | 35.509                  | 2.526             | 17.43     | 35.493                  | 2.527             | -0.02               |
| [0 4 1]     | 35.657                  | 2.516             | 5.07      | 35.255                  | 2.544             | -0.40               |
| [6 2 2]     | 43.410                  | 2.083             | 7.37      | 43.302                  | 2.088             | -0.11               |
| [0 4 3]     | 44.647                  | 2.028             | 6.72      | 44.453                  | 2.036             | -0.19               |
| [6 2 3]     | 48.449                  | 1.877             | 22.46     | 48.432                  | 1.878             | -0.02               |
| [5 1 4]     | 48.515                  | 1.875             | 5.11      | 48.698                  | 1.868             | 0.18                |
| [3 5 2]     | 50.843                  | 1.794             | 10.94     | 50.390                  | 1.810             | -0.45               |
| [3 1 5]     | 51.067                  | 1.787             | 5.17      | 51.419                  | 1.776             | 0.35                |
| [8 2 1]     | 51.325                  | 1.779             | 5.27      | 51.122                  | 1.785             | -0.20               |
| [6 0 4]     | 51.789                  | 1.764             | 8.97      | 51.959                  | 1.759             | 0.17                |
| [1 5 3]     | 52.546                  | 1.740             | 5.33      | 52.198                  | 1.751             | -0.35               |
| [5 5 2]     | 56.512                  | 1.627             | 5.48      | 56.059                  | 1.639             | -0.45               |
| [3 3 5]     | 57.249                  | 1.608             | 13.64     | 57.429                  | 1.603             | 0.18                |

**Table S.8.** Interatomic distances in titanium oxalate trioxide trihydrate (in Å).

| <b>Distance</b>                 | <b>Exp.<sup>2</sup></b> | <b>Calc.</b> |
|---------------------------------|-------------------------|--------------|
| <b>Ti-O</b>                     |                         |              |
| Ti-O1                           | 2.180(9)                | 2.224        |
| Ti-O2                           | 2.271(8)                | 2.220        |
| Ti-O3                           | 1.829(4)                | 1.796        |
| Ti-O4                           | 1.801(3)                | 1.807        |
| Ti-O5                           | 1.814(3)                | 1.815        |
| Ti-OW1                          | 2.170(10)               | 2.110        |
| <b>C-C</b>                      |                         |              |
| C1-C2                           | 1.550(30)               | 1.536        |
| <b>C-O</b>                      |                         |              |
| C1-O1                           | 1.240(10)               | 1.261        |
| C2-O2                           | 1.220(10)               | 1.259        |
| <b>O-H</b>                      |                         |              |
| OW1-H11                         | 0.97(5)                 | 0.992        |
| OW1-H12                         | 0.98(7)                 | 0.996        |
| OW2-H2 × 2                      | 0.97(2)                 | 0.989        |
| <b>Hydrogen bonds Oi-H...Oj</b> |                         |              |
| OW1...O2                        | 2.807(11)               | 2.709        |
| H11-O2                          | 2.04(6)                 | 1.726        |
| OW1...OW2                       | 2.853(9)                | 2.735        |
| H12...Ow2                       | 1.87(7)                 | 1.776        |
| OW2...O1 × 2                    | 2.909(8)                | 2.800        |
| H2...O1 × 2                     | 2.16(3)                 | 1.922        |

**Table S.9.** Interatomic angles in titanium oxalate trioxide trihydrate (in degrees).

| Angle                           | Exp. <sup>2</sup> | Calc.  |
|---------------------------------|-------------------|--------|
| <b>O-Ti-O</b>                   |                   |        |
| O1-Ti-O2                        | 75.2(5)           | 73.61  |
| O1-Ti-O3                        | 88.6(4)           | 89.26  |
| O1-Ti-O4                        | 158.4(5)          | 156.50 |
| O1-Ti-O5                        | 93.2(6)           | 92.43  |
| O1-Ti-OW1                       | 79.3(5)           | 75.37  |
| O2-Ti-O3                        | 162.6(5)          | 162.79 |
| O2-Ti-O4                        | 88.7(4)           | 93.52  |
| O2-Ti-O5                        | 87.2(5)           | 82.66  |
| O2-Ti-OW1                       | 80.3(5)           | 78.67  |
| O3-Ti-O4                        | 105.3(4)          | 102.02 |
| O3-Ti-O5                        | 100.2(4)          | 99.97  |
| O3-Ti-OW1                       | 90.7(6)           | 95.79  |
| O4-Ti-O5                        | 100.3(2)          | 105.59 |
| O4-Ti-OW1                       | 84.0(4)           | 82.96  |
| O5-Ti-OW1                       | 166.7(6)          | 159.94 |
| <b>O-C-O</b>                    |                   |        |
| O2-C2-O2'                       | 123(1)            | 127.29 |
| O1-C2-O1'                       | 123(1)            | 126.47 |
| <b>C-C-O</b>                    |                   |        |
| C1-C2-O2                        | 118(2)            | 116.34 |
| C2-C1-O1                        | 118(2)            | 116.34 |
| <b>O-H-O</b>                    |                   |        |
| H11-OW1-H12                     | 103(9)            | 113.27 |
| H2-OW2-H2'                      | 104(3)            |        |
| <b>Hydrogen bonds Oi-H...Oj</b> |                   |        |
| OW1-H11...O2                    | 135(3)            | 169.82 |
| OW1-H12...OW2                   | 178(4)            | 160.35 |
| OW2-H2-O1 × 2                   | 133(2)            | 146.50 |

**Table S.10.** Most intense reflections in the X-ray diffraction pattern of titanium oxalate trioxide trihydrate: (a) X-ray pattern derived from the experimental crystal structure;<sup>2</sup> (b) X-ray pattern derived from the calculated crystal structure.

| $[h\ k\ l]$ | (a) Exp. <sup>2</sup>   |                   |           | (b) Calc.               |                   | $\Delta\ (2\theta)$ |
|-------------|-------------------------|-------------------|-----------|-------------------------|-------------------|---------------------|
|             | $2\theta\ (\text{deg})$ | $d\ (\text{\AA})$ | $I\ (\%)$ | $2\theta\ (\text{deg})$ | $d\ (\text{\AA})$ |                     |
| [1 1 1]     | 13.673                  | 6.471             | 100.00    | 13.757                  | 6.432             | 0.08                |
| [2 0 0]     | 11.413                  | 7.747             | 31.11     | 11.194                  | 7.898             | -0.22               |
| [0 2 1]     | 19.221                  | 4.614             | 21.98     | 18.966                  | 4.675             | -0.25               |
| [1 1 2]     | 20.961                  | 4.235             | 8.11      | 21.585                  | 4.114             | 0.62                |
| [0 2 0]     | 16.889                  | 5.246             | 6.23      | 16.357                  | 5.415             | -0.53               |
| [0 0 2]     | 18.277                  | 4.850             | 4.30      | 19.135                  | 4.635             | 0.86                |
| [1 3 1]     | 27.699                  | 3.218             | 0.96      | 27.081                  | 3.290             | -0.62               |
| [4 0 0]     | 22.941                  | 3.874             | 0.87      | 22.496                  | 3.949             | -0.45               |
| [0 2 2]     | 24.985                  | 3.561             | 0.41      | 25.274                  | 3.521             | 0.29                |
| [2 2 1]     | 22.409                  | 3.964             | 0.25      | 22.076                  | 4.023             | -0.33               |
| [2 2 2]     | 27.545                  | 3.236             | 0.24      | 27.718                  | 3.216             | 0.17                |
| [4 2 1]     | 30.099                  | 2.967             | 0.18      | 29.586                  | 3.017             | -0.51               |
| [3 1 1]     | 21.233                  | 4.181             | 0.12      | 21.050                  | 4.217             | -0.18               |
| [5 1 1]     | 31.458                  | 2.842             | 0.12      | 30.999                  | 2.883             | -0.46               |
| [3 3 1]     | 32.236                  | 2.775             | 0.07      | 31.536                  | 2.835             | -0.70               |
| [1 3 2]     | 32.052                  | 2.790             | 0.06      | 31.905                  | 2.803             | -0.15               |
| [1 1 3]     | 29.453                  | 3.030             | 0.05      | 30.592                  | 2.920             | 1.14                |
| [2 0 2]     | 21.600                  | 4.111             | 0.05      | 22.222                  | 3.997             | 0.62                |
| [2 2 0]     | 20.430                  | 4.344             | 0.04      | 19.864                  | 4.466             | -0.57               |
| [4 0 2]     | 29.488                  | 3.027             | 0.04      | 29.697                  | 3.006             | 0.21                |
| [4 2 2]     | 34.175                  | 2.622             | 0.02      | 34.088                  | 2.628             | -0.09               |
| [6 0 0]     | 34.711                  | 2.582             | 0.02      | 34.025                  | 2.633             | -0.69               |
| [4 2 0]     | 28.625                  | 3.116             | 0.02      | 27.941                  | 3.191             | -0.68               |
| [5 1 2]     | 35.395                  | 2.534             | 0.02      | 35.340                  | 2.538             | -0.05               |
| [0 4 0]     | 34.159                  | 2.623             | 0.01      | 33.060                  | 2.707             | -1.10               |
| [0 2 3]     | 32.504                  | 2.752             | 0.01      | 33.362                  | 2.684             | 0.86                |

**Table S.11.** Unit cell volume and lattice parameters of zinc squarate tetrahydrate under the effect of different external isotropic pressures.

| <b>P (GPa)</b> | <b>Vol. (Å<sup>3</sup>)</b> | <b>a (Å)</b> | <b>b (Å)</b> | <b>c (Å)</b> | <b>α (deg)</b> | <b>β (deg)</b> | <b>γ(deg)</b> |
|----------------|-----------------------------|--------------|--------------|--------------|----------------|----------------|---------------|
| -1.7499        | 938.1966                    | 10.1639      | 12.9808      | 7.3551       | 90.00          | 104.80         | 90.00         |
| -1.5001        | 917.3598                    | 10.0646      | 13.0204      | 7.2287       | 90.00          | 104.44         | 90.00         |
| -0.9999        | 871.7060                    | 9.6916       | 13.1989      | 6.9928       | 90.00          | 102.97         | 90.00         |
| -0.7504        | 849.6655                    | 9.4663       | 13.2943      | 6.9002       | 90.00          | 101.92         | 90.00         |
| -0.5002        | 824.9879                    | 9.1171       | 13.4592      | 6.8170       | 90.00          | 99.52          | 90.00         |
| -0.2500        | 814.4238                    | 9.0587       | 13.4792      | 6.7597       | 90.00          | 99.35          | 90.00         |
| 0.0008         | 803.4061                    | 8.9816       | 13.5039      | 6.7075       | 90.00          | 99.05          | 90.00         |
| 0.2499         | 794.5654                    | 8.9333       | 13.5132      | 6.6638       | 90.00          | 98.99          | 90.00         |
| 0.5003         | 787.0704                    | 8.8949       | 13.5208      | 6.6249       | 90.00          | 98.94          | 90.00         |
| 0.5600         | 785.4252                    | 8.8879       | 13.5233      | 6.6151       | 90.00          | 98.95          | 90.00         |
| 0.6196         | 783.4083                    | 8.8720       | 13.5266      | 6.6074       | 90.00          | 98.90          | 90.00         |
| 0.6806         | 780.9500                    | 8.8369       | 13.5507      | 6.6011       | 90.00          | 98.89          | 90.00         |
| 0.7506         | 778.2663                    | 8.7989       | 13.5715      | 6.5960       | 90.00          | 98.86          | 90.00         |
| 0.9999         | 770.5236                    | 8.7560       | 13.5770      | 6.5599       | 90.00          | 98.87          | 90.00         |
| 1.5000         | 757.8148                    | 8.6804       | 13.5904      | 6.5015       | 90.00          | 98.87          | 90.00         |
| 1.9999         | 746.7125                    | 8.6121       | 13.6043      | 6.4513       | 90.00          | 98.92          | 90.00         |
| 2.9997         | 726.7429                    | 8.4769       | 13.6424      | 6.3639       | 90.00          | 99.07          | 90.00         |
| 4.0002         | 709.8004                    | 8.3592       | 13.6747      | 6.2918       | 90.00          | 99.28          | 90.00         |
| 5.0001         | 694.3503                    | 8.2435       | 13.6937      | 6.2385       | 90.00          | 99.61          | 90.00         |
| 5.9996         | 678.8907                    | 8.1154       | 13.7096      | 6.1940       | 90.00          | 99.89          | 90.00         |
| 8.0004         | 655.0801                    | 7.9531       | 13.7223      | 6.1041       | 90.00          | 100.47         | 90.00         |
| 10.0002        | 635.5663                    | 7.8281       | 13.7363      | 6.0267       | 90.00          | 101.26         | 90.00         |
| 11.9996        | 615.9112                    | 7.6980       | 13.7110      | 5.9759       | 90.00          | 102.44         | 90.00         |

**Table S.12.** Calculated compressibilities of zinc squarate tetrahydrate along  $b$  direction ( $k_b = -1/b \cdot (\partial b/\partial P)_p$ ) for different external isotropic pressures.

| P (GPa) | $k_b(\text{TPa}^{-1})$ | P (GPa) | $k_b(\text{TPa}^{-1})$ | P (GPa) | $k_b(\text{TPa}^{-1})$ |
|---------|------------------------|---------|------------------------|---------|------------------------|
| -1.50   | -23.80                 | -0.10   | -5.39                  | 1.60    | -2.35                  |
| -1.40   | -27.53                 | 0.00    | -6.25                  | 1.80    | -2.50                  |
| -1.30   | -28.52                 | 0.10    | -5.82                  | 2.00    | -2.60                  |
| -1.20   | -27.90                 | 0.20    | -4.05                  | 3.00    | -2.56                  |
| -1.10   | -26.77                 | 0.30    | -1.61                  | 4.00    | -1.97                  |
| -1.00   | -26.25                 | 0.40    | -0.03                  | 5.00    | -1.27                  |
| -0.90   | -27.41                 | 0.50    | -1.30                  | 6.00    | -0.72                  |
| -0.80   | -31.31                 | 0.60    | -8.57                  | 7.00    | -0.45                  |
| -0.70   | -39.00                 | 0.70    | -33.22                 | 8.00    | -0.45                  |
| -0.60   | -51.50                 | 0.80    | -1.10                  | 9.00    | -0.53                  |
| -0.50   | -16.84                 | 0.90    | -1.32                  | 10.00   | -0.04                  |
| -0.40   | -7.07                  | 1.00    | -1.52                  | 11.00   | 0.86                   |
| -0.30   | -3.85                  | 1.20    | -1.86                  | -       | -                      |
| -0.20   | -4.07                  | 1.40    | -2.13                  | -       | -                      |

**Table S.13.** Unit cell volume and lattice parameters of zinc squarate tetrahydrate under the effect of different external pressures applied along the direction of minimum compressibility, [010].

| <b>P (GPa)</b> | <b>Vol. (Å<sup>3</sup>)</b> | <b>a (Å)</b> | <b>b (Å)</b> | <b>c (Å)</b> | <b>α (deg)</b> | <b>β (deg)</b> | <b>γ(deg)</b> |
|----------------|-----------------------------|--------------|--------------|--------------|----------------|----------------|---------------|
| -1.0006        | 796.5419                    | 8.5544       | 14.1555      | 6.6592       | 90.00          | 98.96          | 90.00         |
| -0.6664        | 796.9636                    | 8.6597       | 13.9617      | 6.6708       | 90.00          | 98.83          | 90.00         |
| -0.4996        | 797.6641                    | 8.7153       | 13.8649      | 6.6793       | 90.00          | 98.77          | 90.00         |
| -0.3326        | 798.8661                    | 8.7821       | 13.7605      | 6.6883       | 90.00          | 98.75          | 90.00         |
| -0.2489        | 799.7757                    | 8.8223       | 13.7037      | 6.6932       | 90.00          | 98.75          | 90.00         |
| -0.1673        | 801.1386                    | 8.8730       | 13.6409      | 6.6978       | 90.00          | 98.80          | 90.00         |
| -0.0850        | 802.8113                    | 8.9337       | 13.5711      | 6.7028       | 90.00          | 98.93          | 90.00         |
| 0.0205         | 804.5806                    | 9.0035       | 13.4859      | 6.7115       | 90.00          | 99.13          | 90.00         |
| 0.0830         | 805.5518                    | 9.0388       | 13.4380      | 6.7193       | 90.00          | 99.24          | 90.00         |
| 0.1661         | 806.6678                    | 9.0879       | 13.3743      | 6.7268       | 90.00          | 99.38          | 90.00         |
| 0.2510         | 807.4273                    | 9.1427       | 13.3056      | 6.7314       | 90.00          | 99.59          | 90.00         |
| 0.2759         | 807.6782                    | 9.1624       | 13.2826      | 6.7325       | 90.00          | 99.68          | 90.00         |
| 0.2903         | 818.6625                    | 9.4094       | 13.1372      | 6.7572       | 90.00          | 101.45         | 90.00         |
| 0.3338         | 820.7121                    | 9.4752       | 13.0797      | 6.7643       | 90.00          | 101.76         | 90.00         |
| 0.3664         | 823.5613                    | 9.5507       | 13.0227      | 6.7759       | 90.00          | 102.25         | 90.00         |
| 0.4329         | 828.4791                    | 9.6955       | 12.9050      | 6.7957       | 90.00          | 103.00         | 90.00         |
| 0.4997         | 833.6776                    | 9.8130       | 12.8091      | 6.8220       | 90.00          | 103.54         | 90.00         |
| 0.5826         | 836.0282                    | 9.9001       | 12.7122      | 6.8419       | 90.00          | 103.85         | 90.00         |
| 0.6662         | 838.4319                    | 9.9793       | 12.6097      | 6.8713       | 90.00          | 104.15         | 90.00         |
| 0.7082         | 840.1959                    | 10.0108      | 12.5552      | 6.8979       | 90.00          | 104.28         | 90.00         |
| 0.7505         | 841.9666                    | 10.0519      | 12.4954      | 6.9222       | 90.00          | 104.45         | 90.00         |



**Table S.14.** Calculated volumetric compressibilities ( $k_V = -1/V \cdot (\partial V/\partial P)_P$ ) of zinc squarate tetrahydrate for different external pressures applied along the direction of minimum compressibility, [010].

| <b>P (GPa)</b> | <b><math>k_V(\text{TPa}^{-1})</math></b> | <b>P (GPa)</b> | <b><math>k_V(\text{TPa}^{-1})</math></b> |
|----------------|------------------------------------------|----------------|------------------------------------------|
| -0.50          | -5.28                                    | 0.20           | -11.74                                   |
| -0.45          | -6.75                                    | 0.25           | -11.75                                   |
| -0.40          | -9.04                                    | 0.29           | -1021.92                                 |
| -0.35          | -11.90                                   | 0.30           | -58.34                                   |
| -0.30          | -15.04                                   | 0.35           | -85.92                                   |
| -0.25          | -18.09                                   | 0.40           | -103.46                                  |
| -0.20          | -20.71                                   | 0.45           | -93.16                                   |
| -0.15          | -22.59                                   | 0.50           | -63.10                                   |
| -0.10          | -23.49                                   | 0.55           | -33.42                                   |
| -0.05          | -23.27                                   | 0.60           | -23.41                                   |
| 0.00           | -21.92                                   | 0.65           | -38.80                                   |
| 0.05           | -19.60                                   | 0.70           | -58.90                                   |
| 0.10           | -16.69                                   | 0.75           | -24.00                                   |
| 0.15           | -13.78                                   | -              | -                                        |

**Fig. S.1.** Views of the computed unit cell of zinc squarate tetrahydrate from [001] under the effect of two different pressures applied along the direction of minimum compressibility: (A)  $P = 0.276$  GPa; (B)  $P = 0.290$  GPa.

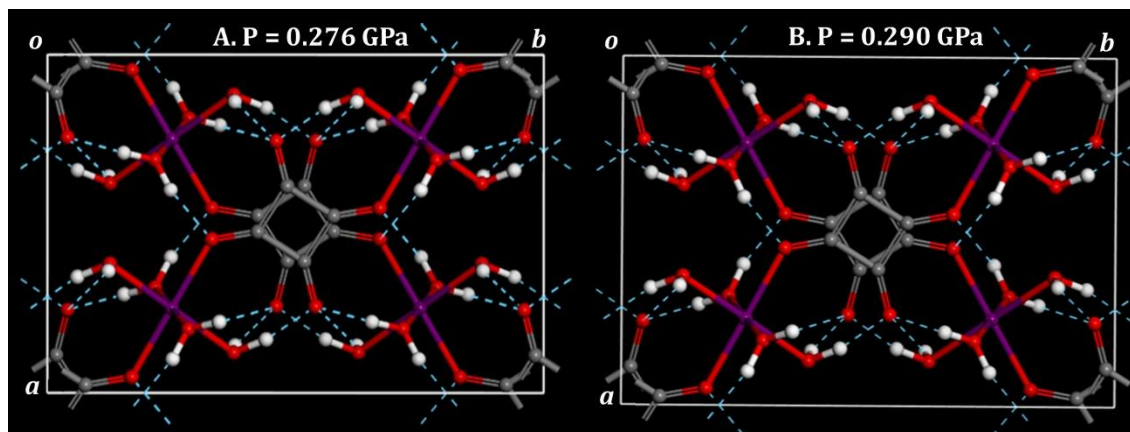

**Table S.15.** Unit cell volume and lattice parameters of titanium oxalate trioxide dihydrate under the effect of different external isotropic pressures.

| <b>P (GPa)</b> | <b>Vol. (Å<sup>3</sup>)</b> | <b>a (Å)</b> | <b>b (Å)</b> | <b>c (Å)</b> | <b>α (deg)</b> | <b>β (deg)</b> | <b>γ(deg)</b> |
|----------------|-----------------------------|--------------|--------------|--------------|----------------|----------------|---------------|
| -3.4995        | 1720.6618                   | 15.3949      | 11.3295      | 9.8653       | 90.00          | 90.00          | 90.00         |
| -2.9998        | 1699.8659                   | 15.3913      | 11.2334      | 9.8317       | 90.00          | 90.00          | 90.00         |
| -2.5001        | 1679.4531                   | 15.3899      | 11.1354      | 9.8000       | 90.00          | 90.00          | 90.00         |
| -1.9998        | 1659.1499                   | 15.3949      | 11.0342      | 9.7672       | 90.00          | 90.00          | 90.00         |
| -1.5001        | 1638.8068                   | 15.4050      | 10.9296      | 9.7333       | 90.00          | 90.00          | 90.00         |
| -1.0000        | 1618.2137                   | 15.4200      | 10.8212      | 9.6979       | 90.00          | 90.00          | 90.00         |
| -0.7503        | 1607.5812                   | 15.4300      | 10.7644      | 9.6787       | 90.00          | 90.00          | 90.00         |
| -0.4997        | 1597.0121                   | 15.4402      | 10.7083      | 9.6590       | 90.00          | 90.00          | 90.00         |
| -0.2506        | 1586.0487                   | 15.4519      | 10.6493      | 9.6385       | 90.00          | 90.00          | 90.00         |
| 0.0001         | 1570.0510                   | 15.4823      | 10.5510      | 9.6114       | 90.00          | 90.00          | 90.00         |
| 0.2508         | 1555.0545                   | 15.5026      | 10.4658      | 9.5845       | 90.00          | 90.00          | 90.00         |
| 0.5002         | 1535.4443                   | 15.5289      | 10.3522      | 9.5513       | 90.00          | 90.00          | 90.00         |
| 0.7504         | 1516.1407                   | 15.5464      | 10.2438      | 9.5203       | 90.00          | 90.00          | 90.00         |
| 1.0000         | 1500.1189                   | 15.5551      | 10.1585      | 9.4934       | 90.00          | 90.00          | 90.00         |
| 1.4998         | 1474.6533                   | 15.5614      | 10.0324      | 9.4458       | 90.00          | 90.00          | 90.00         |
| 2.0001         | 1455.2941                   | 15.5605      | 9.9454       | 9.4039       | 90.00          | 90.00          | 90.00         |
| 2.9996         | 1423.8666                   | 15.5513      | 9.8170       | 9.3266       | 90.00          | 90.00          | 90.00         |
| 4.0000         | 1398.1137                   | 15.5409      | 9.7192       | 9.2563       | 90.00          | 90.00          | 90.00         |

**Table S.16.** Calculated compressibilities of titanium oxalate trioxide dihydrate along  $a$  direction ( $k_a = -1/a \cdot (\partial a/\partial P)_P$ ) for different external isotropic pressures.

| <b>P (GPa)</b> | <b><math>k_a(\text{TPa}^{-1})</math></b> | <b>P (GPa)</b> | <b><math>k_a(\text{TPa}^{-1})</math></b> |
|----------------|------------------------------------------|----------------|------------------------------------------|
| -3.00          | 0.72                                     | 0.25           | -6.58                                    |
| -2.50          | -0.30                                    | 0.50           | -6.18                                    |
| -2.00          | -1.14                                    | 0.75           | -3.91                                    |
| -1.50          | -1.49                                    | 1.00           | -1.63                                    |
| -1.00          | -2.11                                    | 1.50           | -0.20                                    |
| -0.75          | -2.77                                    | 2.00           | 0.35                                     |
| -0.50          | -3.72                                    | 2.50           | 0.60                                     |
| -0.25          | -4.85                                    | 3.00           | 0.78                                     |
| 0.00           | -5.94                                    | 3.50           | 0.77                                     |

**Table S.17.** Unit cell volume and lattice parameters of titanium oxalate trioxide dihydrate under the effect of different external pressures applied along the direction of minimum compressibility, [100].

| <b>P (GPa)</b> | <b>Vol. (Å<sup>3</sup>)</b> | <b>a (Å)</b> | <b>b (Å)</b> | <b>c (Å)</b> | <b>α (deg)</b> | <b>β (deg)</b> | <b>γ(deg)</b> |
|----------------|-----------------------------|--------------|--------------|--------------|----------------|----------------|---------------|
| -1.0009        | 1555.0068                   | 15.9133      | 10.3396      | 9.4508       | 90.00          | 90.00          | 90.00         |
| -0.7172        | 1557.4324                   | 15.7985      | 10.3857      | 9.4920       | 90.00          | 90.00          | 90.00         |
| -0.5013        | 1560.0484                   | 15.7084      | 10.4244      | 9.5269       | 90.00          | 90.00          | 90.00         |
| -0.3331        | 1563.2535                   | 15.6348      | 10.4677      | 9.5519       | 90.00          | 90.00          | 90.00         |
| -0.2498        | 1564.7442                   | 15.5980      | 10.4867      | 9.5661       | 90.00          | 90.00          | 90.00         |
| -0.1672        | 1566.5938                   | 15.5597      | 10.5077      | 9.5819       | 90.00          | 90.00          | 90.00         |
| 0.0006         | 1570.0644                   | 15.4823      | 10.5510      | 9.6114       | 90.00          | 90.00          | 90.00         |
| 0.1674         | 1573.4620                   | 15.4034      | 10.5951      | 9.6413       | 90.00          | 90.00          | 90.00         |
| 0.2500         | 1575.9919                   | 15.3588      | 10.6232      | 9.6593       | 90.00          | 90.00          | 90.00         |
| 0.3334         | 1578.1013                   | 15.3150      | 10.6494      | 9.6759       | 90.00          | 90.00          | 90.00         |
| 0.5005         | 1582.4577                   | 15.2237      | 10.7093      | 9.7063       | 90.00          | 90.00          | 90.00         |
| 0.6674         | 1586.4240                   | 15.1292      | 10.7647      | 9.7409       | 90.00          | 90.00          | 90.00         |
| 0.8328         | 1590.2233                   | 15.0308      | 10.8271      | 9.7716       | 90.00          | 90.00          | 90.00         |
| 1.0000         | 1593.3192                   | 14.9295      | 10.8843      | 9.8052       | 90.00          | 90.00          | 90.00         |
| 1.3337         | 1598.4311                   | 14.7184      | 11.0069      | 9.8667       | 90.00          | 90.00          | 90.00         |
| 1.6662         | 1601.1461                   | 14.5013      | 11.1255      | 9.9244       | 90.00          | 90.00          | 90.00         |
| 2.0009         | 1601.7892                   | 14.2859      | 11.2359      | 9.9790       | 90.00          | 90.00          | 90.00         |
| 2.6658         | 1597.9674                   | 13.8620      | 11.4372      | 10.0791      | 90.00          | 90.00          | 90.00         |
| 3.3335         | 1589.1939                   | 13.4615      | 11.6111      | 10.1674      | 90.00          | 90.00          | 90.00         |
| 4.0003         | 1577.3757                   | 13.0762      | 11.7633      | 10.2548      | 90.00          | 90.00          | 90.00         |

**Table S.18.** Calculated volumetric compressibilities ( $k_V = -1/V \cdot (\partial V/\partial P)_P$ ) of titanium oxalate trioxide dihydrate for different external pressures applied along the direction of minimum compressibility, [010].

| <b>P (GPa)</b> | <b><math>k_V(\text{TPa}^{-1})</math></b> | <b>P (GPa)</b> | <b><math>k_V(\text{TPa}^{-1})</math></b> |
|----------------|------------------------------------------|----------------|------------------------------------------|
| -1.00          | -3.50                                    | 0.50           | -15.35                                   |
| -0.72          | -7.02                                    | 0.67           | -14.53                                   |
| -0.50          | -9.88                                    | 0.83           | -13.30                                   |
| -0.33          | -11.90                                   | 1.00           | -11.69                                   |
| -0.25          | -12.78                                   | 1.33           | -7.70                                    |
| -0.17          | -13.55                                   | 1.67           | -3.30                                    |
| 0.00           | -14.78                                   | 2.00           | 0.89                                     |
| 0.17           | -15.49                                   | 2.67           | 6.56                                     |
| 0.25           | -15.65                                   | 3.50           | 9.61                                     |
| 0.33           | -15.68                                   | -              | -                                        |

**Table S.19.** Unit cell volume and lattice parameters of titanium oxalate trioxide trihydrate under the effect of different external isotropic pressures.

| <b>P (GPa)</b> | <b>Vol. (Å<sup>3</sup>)</b> | <b>a (Å)</b> | <b>b (Å)</b> | <b>c (Å)</b> | <b>α (deg)</b> | <b>β (deg)</b> | <b>γ(deg)</b> |
|----------------|-----------------------------|--------------|--------------|--------------|----------------|----------------|---------------|
| -0.2497        | 1592.8611                   | 15.7968      | 10.8649      | 9.2808       | 90.00          | 90.00          | 90.00         |
| -0.0010        | 1585.6488                   | 15.7967      | 10.8294      | 9.2691       | 90.00          | 90.00          | 90.00         |
| 0.2498         | 1578.3418                   | 15.7965      | 10.7940      | 9.2567       | 90.00          | 90.00          | 90.00         |
| 0.4990         | 1571.2949                   | 15.7964      | 10.7602      | 9.2444       | 90.00          | 90.00          | 90.00         |
| 0.7499         | 1563.7431                   | 15.7967      | 10.7224      | 9.2322       | 90.00          | 90.00          | 90.00         |
| 0.9988         | 1556.5141                   | 15.7970      | 10.6864      | 9.2204       | 90.00          | 90.00          | 90.00         |
| 1.4989         | 1541.6091                   | 15.7963      | 10.6116      | 9.1969       | 90.00          | 90.00          | 90.00         |
| 2.0000         | 1526.3997                   | 15.7938      | 10.5349      | 9.1739       | 90.00          | 90.00          | 90.00         |
| 3.0000         | 1496.5243                   | 15.7834      | 10.3843      | 9.1307       | 90.00          | 90.00          | 90.00         |
| 4.0005         | 1468.3155                   | 15.7632      | 10.2456      | 9.0915       | 90.00          | 90.00          | 90.00         |
| 5.0004         | 1442.2247                   | 15.7374      | 10.1192      | 9.0564       | 90.00          | 90.00          | 90.00         |

**Table S.20.** Calculated compressibilities of titanium oxalate trioxide trihydrate along  $a$  direction ( $k_a = -1/a \cdot (\partial a / \partial P)_P$ ) for different external isotropic pressures.

| P (GPa) | $k_a$ (TPa <sup>-1</sup> ) | P (GPa) | $k_a$ (TPa <sup>-1</sup> ) |
|---------|----------------------------|---------|----------------------------|
| -0.10   | 0.05                       | 0.80    | -0.10                      |
| 0.00    | 0.06                       | 0.90    | -0.09                      |
| 0.10    | 0.06                       | 1.00    | -0.07                      |
| 0.20    | 0.05                       | 1.10    | -0.02                      |
| 0.30    | 0.03                       | 1.20    | 0.04                       |
| 0.40    | 0.00                       | 1.30    | 0.12                       |
| 0.50    | -0.03                      | 1.40    | 0.21                       |
| 0.60    | -0.06                      | 1.50    | 0.30                       |
| 0.70    | -0.08                      |         |                            |



**Table S.21.** Unit cell volume and lattice parameters of titanium oxalate trioxide trihydrate under the effect of different external pressures applied along the direction of minimum compressibility, [100].

| <b>P (GPa)</b> | <b>Vol. (Å<sup>3</sup>)</b> | <b>a (Å)</b> | <b>b (Å)</b> | <b>c (Å)</b> | <b>α (deg)</b> | <b>β (deg)</b> | <b>γ(deg)</b> |
|----------------|-----------------------------|--------------|--------------|--------------|----------------|----------------|---------------|
| -0.9998        | 1588.5317                   | 16.2824      | 10.6947      | 9.1223       | 90.00          | 90.00          | 90.00         |
| -0.6674        | 1586.7909                   | 16.1155      | 10.7363      | 9.1711       | 90.00          | 90.00          | 90.00         |
| -0.5002        | 1586.2030                   | 16.0343      | 10.7582      | 9.1954       | 90.00          | 90.00          | 90.00         |
| -0.3328        | 1585.8963                   | 15.9540      | 10.7814      | 9.2200       | 90.00          | 90.00          | 90.00         |
| -0.2504        | 1585.9209                   | 15.9140      | 10.7952      | 9.2315       | 90.00          | 90.00          | 90.00         |
| -0.1662        | 1585.9831                   | 15.8744      | 10.8085      | 9.2435       | 90.00          | 90.00          | 90.00         |
| -0.0840        | 1585.9211                   | 15.8346      | 10.8204      | 9.2561       | 90.00          | 90.00          | 90.00         |
| 0.0001         | 1585.5359                   | 15.7967      | 10.8288      | 9.2689       | 90.00          | 90.00          | 90.00         |
| 0.0846         | 1584.9613                   | 15.7607      | 10.8362      | 9.2804       | 90.00          | 90.00          | 90.00         |
| 0.2015         | 1584.7977                   | 15.7066      | 10.8506      | 9.2991       | 90.00          | 90.00          | 90.00         |
| 0.3328         | 1585.0600                   | 15.6454      | 10.8713      | 9.3191       | 90.00          | 90.00          | 90.00         |
| 0.5001         | 1585.3539                   | 15.5692      | 10.8992      | 9.3425       | 90.00          | 90.00          | 90.00         |
| 0.6655         | 1585.7595                   | 15.4935      | 10.9258      | 9.3677       | 90.00          | 90.00          | 90.00         |
| 0.9994         | 1586.2337                   | 15.3462      | 10.9761      | 9.4171       | 90.00          | 90.00          | 90.00         |
| 1.6669         | 1586.7386                   | 15.0621      | 11.0739      | 9.5131       | 90.00          | 90.00          | 90.00         |
| 2.3331         | 1587.2333                   | 14.7890      | 11.1718      | 9.6068       | 90.00          | 90.00          | 90.00         |
| 2.9997         | 1587.6221                   | 14.5250      | 11.2720      | 9.6969       | 90.00          | 90.00          | 90.00         |
| 3.6660         | 1587.7488                   | 14.2714      | 11.3733      | 9.7820       | 90.00          | 90.00          | 90.00         |
| 3.9993         | 1587.6855                   | 14.1486      | 11.4250      | 9.8218       | 90.00          | 90.00          | 90.00         |

**Table S.22.** Calculated volumetric compressibilities ( $k_V = -1/V \cdot (\partial V/\partial P)_P$ ) of titanium oxalate trioxide trihydrate for different external pressures applied along the direction of minimum compressibility, [010].

| P (GPa) | $k_V$ (TPa <sup>-1</sup> ) | P (GPa) | $k_V$ (TPa <sup>-1</sup> ) |
|---------|----------------------------|---------|----------------------------|
| -0.80   | 3.30                       | 0.20    | -0.46                      |
| -0.70   | 2.91                       | 0.25    | -1.19                      |
| -0.60   | 2.37                       | 0.30    | -1.32                      |
| -0.50   | 1.70                       | 0.40    | -1.31                      |
| -0.40   | 0.94                       | 0.50    | -1.26                      |
| -0.30   | 0.13                       | 0.60    | -1.18                      |
| -0.25   | -0.38                      | 0.70    | -1.09                      |
| -0.20   | -0.52                      | 0.80    | -0.98                      |
| -0.15   | -0.08                      | 0.90    | -0.87                      |
| -0.10   | 1.06                       | 1.00    | -0.77                      |
| -0.05   | 2.65                       | 1.50    | -0.42                      |
| 0.00    | 4.11                       | 2.00    | -0.39                      |
| 0.05    | 3.92                       | 2.50    | -0.46                      |
| 0.10    | 2.07                       | 3.00    | -0.32                      |
| 0.15    | 0.62                       | 3.50    | 0.04                       |

## References

- 1 C. Robl, W. F. Kuhs, Hydrogen Bonding in the Chain-like Coordination Polymer  $\text{ZnC}_4\text{O}_4 \cdot 4\text{H}_2\text{O}$ : A Neutron Diffraction Study, *J. Solid State Chem.*, 1988, **75**, 15–20.
- 2 C. Boudaren, T. Bataille, J. P. Auffrédic, D. Louër, Synthesis, structure determination from powder diffraction data and thermal behaviour of titanium(IV) oxalate  $[\text{Ti}_2\text{O}_3(\text{H}_2\text{O})_2](\text{C}_2\text{O}_4) \cdot \text{H}_2\text{O}$ , *Solid State Sci.*, 2003, **5**, 175–182.
